# Supplementary material
Source: PubMed Central journal article supplement (PMC6478533)
Supplement: NIHMS1519672-supplement-1.pdf [file NIHMS1519672-supplement-1.pdf]

## **Supplemental Data**

### **Comparison of The Effects of High Fat Diet on Energy Flux in Mice Using Two Multiplexed Metabolic Phenotyping Systems**

Jamie E. Soto<sup>1,4</sup>, Colin M.L. Burnett<sup>1,2</sup>, Patrick Ten Eyck<sup>3</sup>, E. Dale Abel<sup>1,4,5,7</sup>, Justin L. Grobe<sup>2,4,5,6,7,8</sup>

Departments of <sup>1</sup>Internal Medicine and <sup>2</sup>Pharmacology, <sup>3</sup>Institute for Clinical and Translational Science, <sup>4</sup>Fraternal Order of Eagles' Diabetes Research Center, <sup>5</sup>Obesity Research & Education Initiative, <sup>6</sup>UIHC Center for Hypertension Research, <sup>7</sup>Abboud Cardiovascular Research Center, and <sup>8</sup>Iowa Neuroscience Institute, University of Iowa, Iowa City, IA 52242

Running head: Multiplexed Phenotyping & High Fat Diet

Correspondence should be addressed to:

Justin L. Grobe, PhD  
Department of Pharmacology  
University of Iowa  
51 Newton Rd., 2-307 BSB  
Iowa City, IA 52242  
(319) 353-5789  
justin-grobe@uiowa.edu

Funding: The investigators were supported by grants from the NIH (HL134850, HL084207, HL127764, HL112413, UL1TR002537), and the American Heart Association (15SFRN23730000, 16SFRN31810000, 18EIA33890055). The investigators and University of Iowa Metabolic Phenotyping Core also gratefully acknowledge the generous support of the Fraternal Order of Eagles.

Disclosures: The authors declare no conflict of interest.

Keywords: Energy, Metabolism, Calorimetry, OxyMax, Promethion

**Supplemental Table S1. Heat production (kcal/hr, estimated using the Weir equation) during 2920x Chow feeding, weeks 10/11, corrected for relevant co-variates.**

| Variables controlled in model                                 | Factor                | Mean difference<br>(95% CI)      | p-value       | AICc             |
|---------------------------------------------------------------|-----------------------|----------------------------------|---------------|------------------|
| Food ingested, alone                                          | Sex                   | 0.047 (0.030 to 0.064)           | 0.0000        | -264.95          |
|                                                               | Instrument            | 0.014 (0.001 to 0.027)           | 0.0507        |                  |
|                                                               | Food ingested         | 0.066 (-0.015 to 0.147)          | 0.1209        |                  |
| X+Y physical activity, alone                                  | Sex                   | 0.047 (0.030 to 0.063)           | 0.0000        | -264.67          |
|                                                               | Instrument            | -0.007 (-0.028 to 0.013)         | 0.4822        |                  |
|                                                               | X+Y physical activity | 0.000 (0.000 to 0.000)           | 0.0000        |                  |
| Total body mass, alone                                        | Sex                   | -0.032 (-0.067 to 0.004)         | 0.0910        | -279.30          |
|                                                               | Instrument            | 0.009 (-0.002 to 0.019)          | 0.1075        |                  |
|                                                               | Total body mass       | 0.012 (0.007 to 0.018)           | 0.0001        |                  |
| <b>Lean body mass, alone</b>                                  | <b>Sex</b>            | <b>-0.043 (-0.072 to -0.014)</b> | <b>0.0071</b> | <b>-289.03 †</b> |
|                                                               | <b>Instrument</b>     | <b>0.006 (-0.004 to 0.017)</b>   | <b>0.2321</b> |                  |
|                                                               | <b>Lean body mass</b> | <b>0.016 (0.011 to 0.021)</b>    | <b>0.0000</b> |                  |
| Total body mass +<br>X+Y physical activity                    | Sex                   | -0.030 (-0.066 to 0.007)         | 0.1262        | -276.91          |
|                                                               | Instrument            | 0.005 (-0.016 to 0.025)          | 0.6560        |                  |
|                                                               | Total body mass       | 0.012 (0.007 to 0.018)           | 0.0002        |                  |
|                                                               | X+Y physical activity | 0.000 (0.000 to 0.000)           | 0.0000        |                  |
| Total body mass +<br>Food ingested                            | Sex                   | -0.029 (-0.066 to 0.007)         | 0.1293        | -277.12          |
|                                                               | Instrument            | 0.011 (-0.002 to 0.024)          | 0.1032        |                  |
|                                                               | Total body mass       | 0.012 (0.007 to 0.018)           | 0.0002        |                  |
|                                                               | Food ingested         | 0.024 (-0.053 to 0.102)          | 0.5472        |                  |
| Total body mass +<br>X+Y physical activity +<br>Food ingested | Sex                   | -0.027 (-0.065 to 0.011)         | 0.1752        | -274.69          |
|                                                               | Instrument            | 0.007 (-0.015 to 0.029)          | 0.5335        |                  |
|                                                               | Total body mass       | 0.012 (0.006 to 0.017)           | 0.0003        |                  |
|                                                               | X+Y physical activity | 0.000 (0.000 to 0.000)           | 0.0000        |                  |
|                                                               | Food ingested         | 0.026 (-0.046 to 0.097)          | 0.4876        |                  |
| Lean body mass +<br>X+Y physical activity                     | Sex                   | -0.030 (-0.066 to 0.007)         | 0.01262       | -276.91          |
|                                                               | Instrument            | 0.005 (-0.016 to 0.025)          | 0.6560        |                  |
|                                                               | Lean body mass        | 0.012 (0.007 to 0.018)           | 0.0002        |                  |
|                                                               | X+Y physical activity | 0.000 (0.000 to 0.000)           | 0.0000        |                  |
| Lean body mass +<br>Food ingested                             | Sex                   | -0.042 (-0.072 to -0.013)        | 0.0094        | -286.55          |
|                                                               | Instrument            | 0.007 (-0.005 to 0.020)          | 0.2700        |                  |
|                                                               | Lean body mass        | 0.016 (0.011 to 0.021)           | 0.0000        |                  |
|                                                               | Food ingested         | 0.009 (-0.062 to 0.081)          | 0.7990        |                  |
| Lean body mass +<br>X+Y physical activity +<br>Food ingested  | Sex                   | -0.043 (-0.073 to -0.012)        | 0.0109        | -283.91          |
|                                                               | Instrument            | 0.008 (-0.013 to 0.029)          | 0.4751        |                  |
|                                                               | Lean body mass        | 0.016 (0.011 to 0.021)           | 0.0000        |                  |
|                                                               | X+Y physical activity | 0.000 (0.000 to 0.000)           | 0.0000        |                  |
|                                                               | Food ingested         | 0.009 (-0.056 to 0.074)          | 0.7837        |                  |

AICc: Akaike information criterion, corrected. \* Note that effect of instrument is not significant, regardless of model. † Note AICc value was minimized in model corrected for lean body mass alone

**Supplemental Table S2. Heat production (kcal/hr, estimated using the Lusk equation) during 2920x Chow feeding, weeks 10/11, corrected for relevant co-variates.**

| Variables controlled in model                                 | Factor                | Mean difference<br>(95% CI)      | p-value       | AICc             |
|---------------------------------------------------------------|-----------------------|----------------------------------|---------------|------------------|
| Food ingested, alone                                          | Sex                   | 0.047 (0.030 to 0.064)           | 0.0000        | -265.20          |
|                                                               | Instrument            | 0.014 (0.000 to 0.027)           | 0.0538        |                  |
|                                                               | Food ingested         | 0.066 (-0.014 to 0.147)          | 0.1173        |                  |
| X+Y physical activity, alone                                  | Sex                   | 0.046 (0.030 to 0.063)           | 0.0000        | -264.93          |
|                                                               | Instrument            | -0.008 (-0.028 to 0.013)         | 0.4560        |                  |
|                                                               | X+Y physical activity | 0.000 (0.000 to 0.000)           | 0.0000        |                  |
| Total body mass, alone                                        | Sex                   | -0.032 (-0.067 to 0.003)         | 0.0876        | -279.60          |
|                                                               | Instrument            | 0.008 (-0.002 to 0.018)          | 0.1184        |                  |
|                                                               | Total body mass       | 0.012 (0.007 to 0.018)           | 0.0001        |                  |
| <b>Lean body mass, alone</b>                                  | <b>Sex</b>            | <b>-0.043 (-0.072 to -0.014)</b> | <b>0.0066</b> | <b>-289.41 †</b> |
|                                                               | <b>Instrument</b>     | <b>0.006 (-0.004 to 0.016)</b>   | <b>0.2524</b> |                  |
|                                                               | <b>Lean body mass</b> | <b>0.016 (0.011 to 0.021)</b>    | <b>0.0000</b> |                  |
| Total body mass +<br>X+Y physical activity                    | Sex                   | -0.030 (-0.066 to 0.007)         | 0.1232        | -279.60          |
|                                                               | Instrument            | 0.004 (-0.016 to 0.024)          | 0.6869        |                  |
|                                                               | Total body mass       | 0.012 (0.007 to 0.018)           | 0.0002        |                  |
|                                                               | X+Y physical activity | 0.000 (0.000 to 0.000)           | 0.0000        |                  |
| Total body mass +<br>Food ingested                            | Sex                   | -0.029 (-0.066 to 0.007)         | 0.1257        | -277.44          |
|                                                               | Instrument            | 0.011 (-0.002 to 0.024)          | 0.1092        |                  |
|                                                               | Total body mass       | 0.012 (0.007 to 0.018)           | 0.0001        |                  |
|                                                               | Food ingested         | 0.025 (-0.053 to 0.102)          | 0.5380        |                  |
| Total body mass +<br>X+Y physical activity +<br>Food ingested | Sex                   | -0.027 (-0.065 to 0.011)         | 0.1726        | -275.03          |
|                                                               | Instrument            | 0.007 (-0.015 to 0.028)          | 0.5558        |                  |
|                                                               | Total body mass       | 0.012 (0.006 to 0.017)           | 0.0003        |                  |
|                                                               | X+Y physical activity | 0.000 (0.000 to 0.000)           | 0.0000        |                  |
|                                                               | Food ingested         | 0.026 (-0.045 to 0.097)          | 0.4767        |                  |
| Lean body mass +<br>X+Y physical activity                     | Sex                   | -0.030 (-0.066 to 0.007)         | 0.1232        | -277.23          |
|                                                               | Instrument            | 0.004 (-0.016 to 0.024)          | 0.6869        |                  |
|                                                               | Lean body mass        | 0.012 (0.007 to 0.018)           | 0.0002        |                  |
|                                                               | X+Y physical activity | 0.000 (0.000 to 0.000)           | 0.0000        |                  |
| Lean body mass +<br>Food ingested                             | Sex                   | -0.043 (-0.072 to -0.013)        | 0.0088        | -286.94          |
|                                                               | Instrument            | 0.007 (-0.006 to 0.020)          | 0.2845        |                  |
|                                                               | Lean body mass        | 0.016 (0.011 to 0.021)           | 0.0000        |                  |
|                                                               | Food ingested         | 0.010 (-0.061 to 0.081)          | 0.7906        |                  |
| Lean body mass +<br>X+Y physical activity +<br>Food ingested  | Sex                   | -0.043 (-0.073 to -0.012)        | 0.0104        | -284.30          |
|                                                               | Instrument            | 0.007 (-0.014 to 0.028)          | 0.4962        |                  |
|                                                               | Lean body mass        | 0.016 (0.011 to 0.021)           | 0.0000        |                  |
|                                                               | X+Y physical activity | 0.000 (0.000 to 0.000)           | 0.0000        |                  |
|                                                               | Food ingested         | 0.010 (-0.055 to 0.074)          | 0.7730        |                  |

AICc: Akaike information criterion, corrected. Note that effect of instrument is not significant, regardless of model. † Note AICc value was minimized in model corrected for lean body mass alone.

**Supplemental Table S3.** Heat production (kcal/hr, estimated using the Weir equation) after 4 weeks of HFD feeding, week 16, corrected for relevant co-variates.

| Variables controlled in model                                 | Factor                 | Mean difference<br>(95% CI)    | p-value         | AICc             |
|---------------------------------------------------------------|------------------------|--------------------------------|-----------------|------------------|
| Food ingested, alone                                          | Sex                    | 0.050 (0.030 to 0.071)         | 0.0000          | -119.90          |
|                                                               | Instrument             | 0.031 (0.010 to 0.051)         | 0.0063 *        |                  |
|                                                               | Food ingested          | 0.049 (-0.046 to 0.143)        | 0.3217          |                  |
| X+Y physical activity, alone                                  | Sex                    | 0.049 (0.028 to 0.070)         | 0.0001          | -118.90          |
|                                                               | Instrument             | 0.030 (-0.002 to 0.062)        | 0.0780          |                  |
|                                                               | X+Y physical activity  | 0.000 (0.000 to 0.000)         | 0.0000          |                  |
| <b>Total body mass, alone</b>                                 | <b>Sex</b>             | <b>0.013 (-0.020 to 0.046)</b> | <b>0.4315</b>   | <b>-124.81 †</b> |
|                                                               | <b>Instrument</b>      | <b>0.026 (0.007 to 0.045)</b>  | <b>0.0125 *</b> |                  |
|                                                               | <b>Total body mass</b> | <b>0.004 (0.001 to 0.007)</b>  | <b>0.0166</b>   |                  |
| Lean body mass, alone                                         | Sex                    | -0.037 (-0.093 to 0.018)       | 0.1987          | -122.54          |
|                                                               | Instrument             | 0.022 (0.003 to 0.041)         | 0.0286 *        |                  |
|                                                               | Lean body mass         | 0.015 (0.006 to 0.024)         | 0.003           |                  |
| Total body mass +<br>X+Y physical activity                    | Sex                    | 0.011 (-0.023 to 0.044)        | 0.5366          | -122.53          |
|                                                               | Instrument             | 0.036 (0.007 to 0.066)         | 0.0225 *        |                  |
|                                                               | Total body mass        | 0.005 (0.001 to 0.008)         | 0.0109          |                  |
|                                                               | X+Y physical activity  | 0.000 (0.000 to 0.000)         | 0.000           |                  |
| Total body mass +<br>Food ingested                            | Sex                    | 0.015 (-0.018 to 0.047)        | 0.3764          | -122.94          |
|                                                               | Instrument             | 0.027 (0.008 to 0.046)         | 0.0085 *        |                  |
|                                                               | Total body mass        | 0.004 (0.001 to 0.007)         | 0.0149          |                  |
|                                                               | Food ingested          | 0.049 (-0.037 to 0.135)        | 0.2736          |                  |
| Total body mass +<br>X+Y physical activity +<br>Food ingested | Sex                    | 0.011 (-0.021 to 0.042)        | 0.5146          | -121.85          |
|                                                               | Instrument             | 0.046 (0.016 to 0.077)         | 0.0062 *        |                  |
|                                                               | Total body mass        | 0.005 (0.002 to 0.005)         | 0.0052          |                  |
|                                                               | X+Y physical activity  | 0.000 (0.000 to 0.000)         | 0.0000          |                  |
|                                                               | Food ingested          | 0.077 (-0.013 to 0.167)        | 0.1061          |                  |
| Lean body mass +<br>X+Y physical activity                     | Sex                    | -0.051 (-0.108 to 0.006)       | 0.0902          | -121.32          |
|                                                               | Instrument             | 0.038 (0.010 to 0.066)         | 0.0144 *        |                  |
|                                                               | Lean body mass         | 0.017 (0.008 to 0.027)         | 0.0013          |                  |
|                                                               | X+Y physical activity  | 0.000 (0.000 to 0.000)         | 0.0000          |                  |
| Lean body mass +<br>Food ingested                             | Sex                    | -0.034 (-0.092 to 0.023)       | 0.2554          | -119.51          |
|                                                               | Instrument             | 0.023 (0.004 to 0.042)         | 0.0275 *        |                  |
|                                                               | Lean body mass         | 0.015 (0.005 to 0.024)         | 0.0054          |                  |
|                                                               | Food ingested          | 0.015 (-0.072 to 0.103)        | 0.7345          |                  |
| Lean body mass +<br>X+Y physical activity +<br>Food ingested  | Sex                    | -0.047 (-0.104 to 0.011)       | 0.1243          | -118.53          |
|                                                               | Instrument             | 0.042 (0.012 to 0.072)         | 0.0106 *        |                  |
|                                                               | Lean body mass         | 0.017 (0.008 to 0.026)         | 0.0018          |                  |
|                                                               | X+Y physical activity  | 0.000 (0.000 to 0.000)         | 0.0000          |                  |
|                                                               | Food ingested          | 0.036 (-0.052 to 0.124)        | 0.4269          |                  |

AICc: Akaike information criterion, corrected. \* Note  $p < 0.05$  for instrument in almost all models, except X+Y activity alone. † Note AICc value was minimized in model corrected for total body mass alone.

**Supplemental Table S4.** Heat production (kcal/hr, estimated using the Lusk equation) after 4 weeks of HFD feeding, week 16, corrected for relevant co-variates.

| Variables controlled in model                                 | Factor                 | Mean difference<br>(95% CI)    | p-value         | AICc             |
|---------------------------------------------------------------|------------------------|--------------------------------|-----------------|------------------|
| Food ingested, alone                                          | Sex                    | 0.050 (0.030 to 0.070)         | 0.0000          | -120.42          |
|                                                               | Instrument             | 0.031 (0.010 to 0.051)         | 0.0062 *        |                  |
|                                                               | Food ingested          | 0.049 (-0.045 to 0.143)        | 0.3172          |                  |
| X+Y physical activity, alone                                  | Sex                    | 0.049 (0.028 to 0.069)         | 0.0001          | -119.41          |
|                                                               | Instrument             | 0.030 (-0.002 to 0.062)        | 0.0777          |                  |
|                                                               | X+Y physical activity  | 0.000 (0.000 to 0.000)         | 0.0000          |                  |
| <b>Total body mass, alone</b>                                 | <b>Sex</b>             | <b>0.014 (-0.019 to 0.046)</b> | <b>0.4222</b>   | <b>-125.32 †</b> |
|                                                               | <b>Instrument</b>      | <b>0.026 (0.007 to 0.044)</b>  | <b>0.0123 *</b> |                  |
|                                                               | <b>Total body mass</b> | <b>0.004 (0.001 to 0.007)</b>  | <b>0.0166</b>   |                  |
| Lean body mass, alone                                         | Sex                    | -0.037 (-0.092 to 0.018)       | 0.2036          | -123.00          |
|                                                               | Instrument             | 0.022 (0.003 to 0.041)         | 0.0282 *        |                  |
|                                                               | Lean body mass         | 0.015 (0.006 to 0.024)         | 0.0034          |                  |
| Total body mass +<br>X+Y physical activity                    | Sex                    | 0.011 (-0.022 to 0.044)        | 0.5257          | -123.03          |
|                                                               | Instrument             | 0.036 (0.007 to 0.065)         | 0.0224 *        |                  |
|                                                               | Total body mass        | 0.005 (0.001 to 0.008)         | 0.0109          |                  |
| Total body mass +<br>Food ingested                            | X+Y physical activity  | 0.000 (0.000 to 0.000)         | 0.0000          | -123.47          |
|                                                               | Sex                    | 0.015 (-0.017 to 0.047)        | 0.3671          |                  |
|                                                               | Instrument             | 0.027 (0.008 to 0.045)         | 0.0083 *        |                  |
| Total body mass +<br>X+Y physical activity +<br>Food ingested | Total body mass        | 0.004 (0.001 to 0.007)         | 0.0149          | -122.39          |
|                                                               | Food ingested          | 0.049 (-0.036 to 0.134)        | 0.2691          |                  |
|                                                               | Sex                    | 0.011 (-0.021 to 0.042)        | 0.5033          |                  |
| Lean body mass +<br>X+Y physical activity                     | Instrument             | 0.046 (0.016 to 0.076)         | 0.0061 *        | -121.77          |
|                                                               | Total body mass        | 0.005 (0.002 to 0.008)         | 0.0052          |                  |
|                                                               | X+Y physical activity  | 0.000 (0.000 to 0.000)         | 0.0000          |                  |
| Lean body mass +<br>Food ingested                             | Food ingested          | 0.077 (-0.012 to 0.166)        | 0.1040          | -119.97          |
|                                                               | Sex                    | -0.050 (-0.107 to 0.006)       | 0.0930          |                  |
|                                                               | Instrument             | 0.037 (0.010 to 0.065)         | 0.0144 *        |                  |
| Lean body mass +<br>Food ingested                             | Lean body mass         | 0.017 (0.008 to 0.027)         | 0.0013          | -119.00          |
|                                                               | X+Y physical activity  | 0.000 (0.000 to 0.000)         | 0.0000          |                  |
|                                                               | Sex                    | -0.034 (-0.091 to 0.024)       | 0.2624          |                  |
| Lean body mass +<br>X+Y physical activity +<br>Food ingested  | Food ingested          | 0.016 (-0.071 to 0.103)        | 0.7261          | -119.00          |
|                                                               | Lean body mass         | 0.014 (0.005 to 0.024)         | 0.0055          |                  |
|                                                               | Instrument             | 0.023 (0.004 to 0.042)         | 0.0269 *        |                  |
| Lean body mass +<br>X+Y physical activity +<br>Food ingested  | Lean body mass         | 0.017 (0.007 to 0.026)         | 0.0018          | -119.00          |
|                                                               | X+Y physical activity  | 0.000 (0.000 to 0.000)         | 0.0000          |                  |
|                                                               | Sex                    | -0.046 (-0.103 to 0.011)       | 0.1283          |                  |
| Lean body mass +<br>X+Y physical activity +<br>Food ingested  | Food ingested          | 0.036 (-0.051 to 0.124)        | 0.4208          | -119.00          |
|                                                               | Lean body mass         | 0.017 (0.007 to 0.026)         | 0.0018          |                  |
|                                                               | Instrument             | 0.042 (0.012 to 0.071)         | 0.0105 *        |                  |

AICc: Akaike information criterion, corrected. \* Note  $p < 0.05$  for instrument in almost all models, except X+Y physical activity alone. † Note AICc value was minimized in model corrected for total body mass alone.

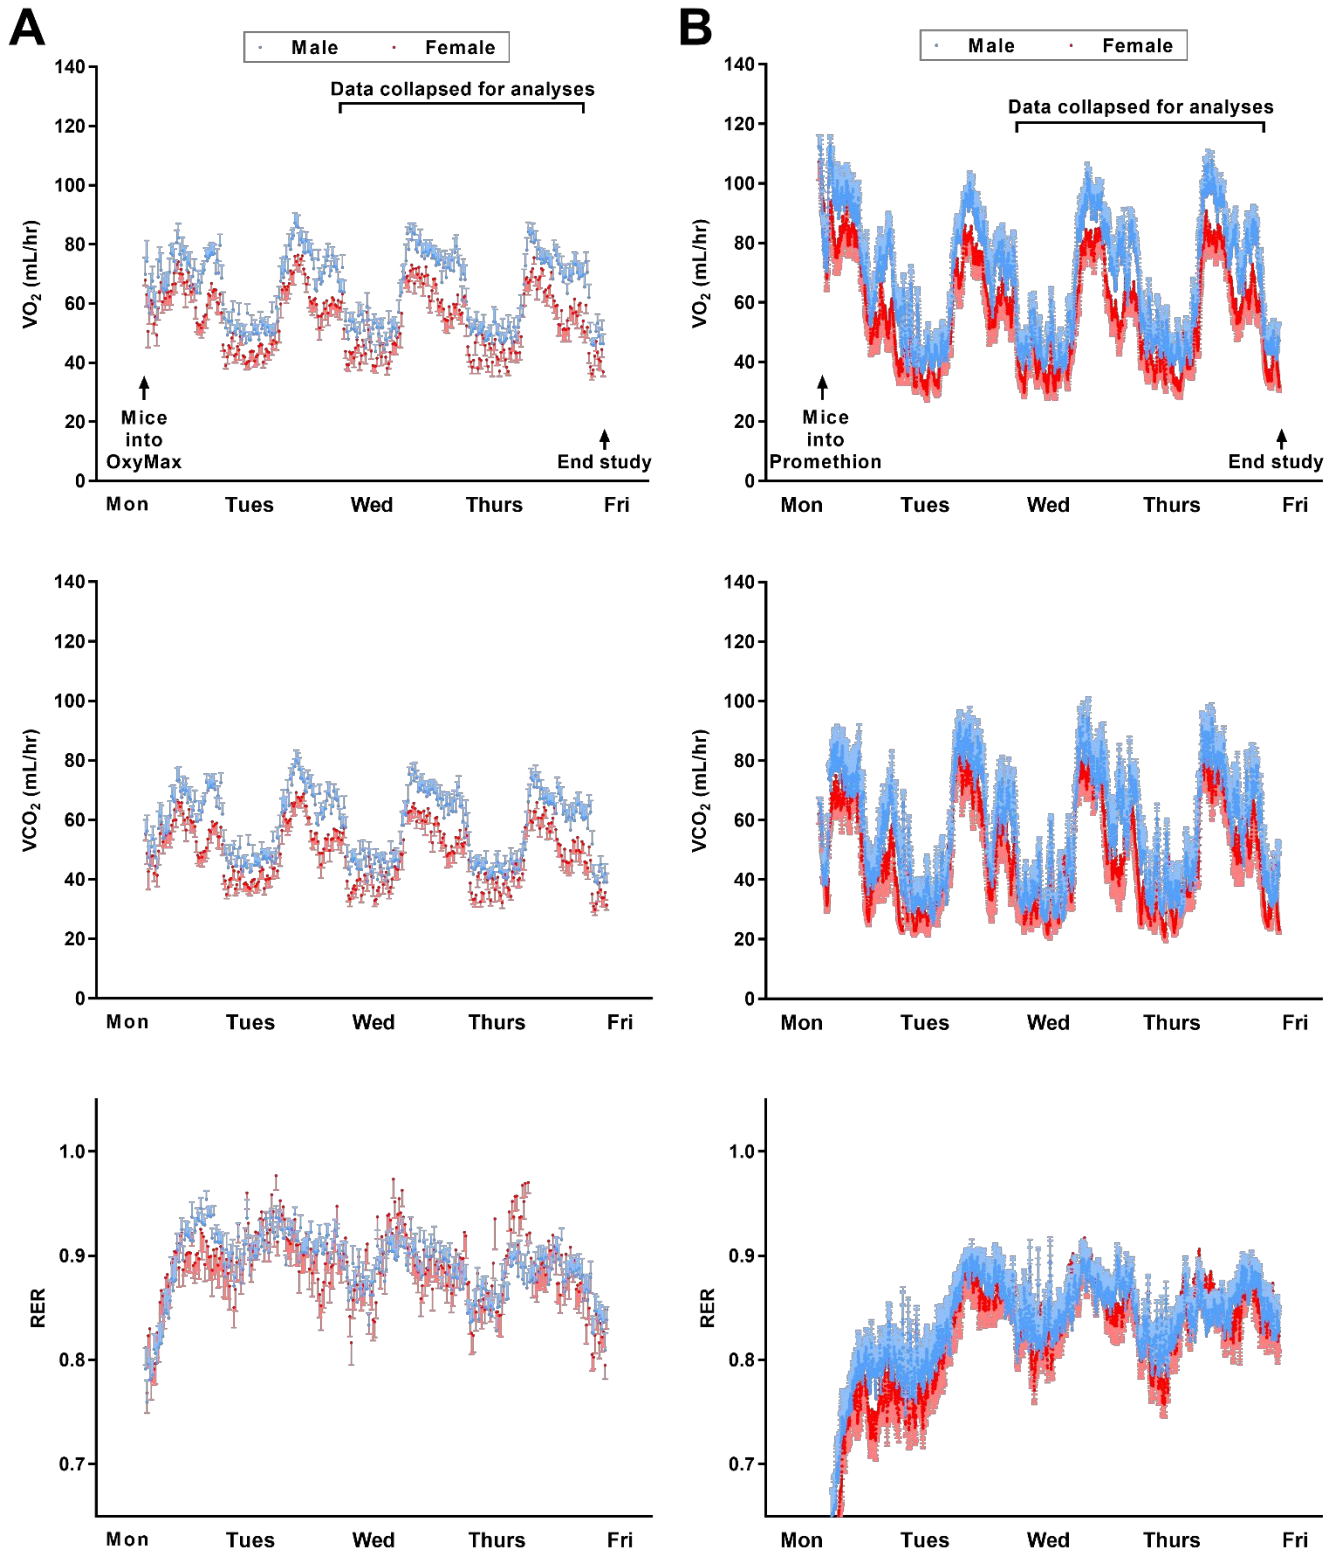

**Supplemental Figure S1. Gas analyzer outputs versus time for entire acclimation plus analysis periods, for C57BL/6J mice maintained on 2920x chow, at 10-11 weeks of age. (A) VO<sub>2</sub>, VCO<sub>2</sub> and RER values obtained from OxyMax system. (B) VO<sub>2</sub>, VCO<sub>2</sub>, and RER values obtained from Promethion system. For all studies, n=16 males + 15 females. Data are presented as mean ± SEM (only showing error bars in a single direction, for clarity). Males are illustrated in blue, and females in red.**

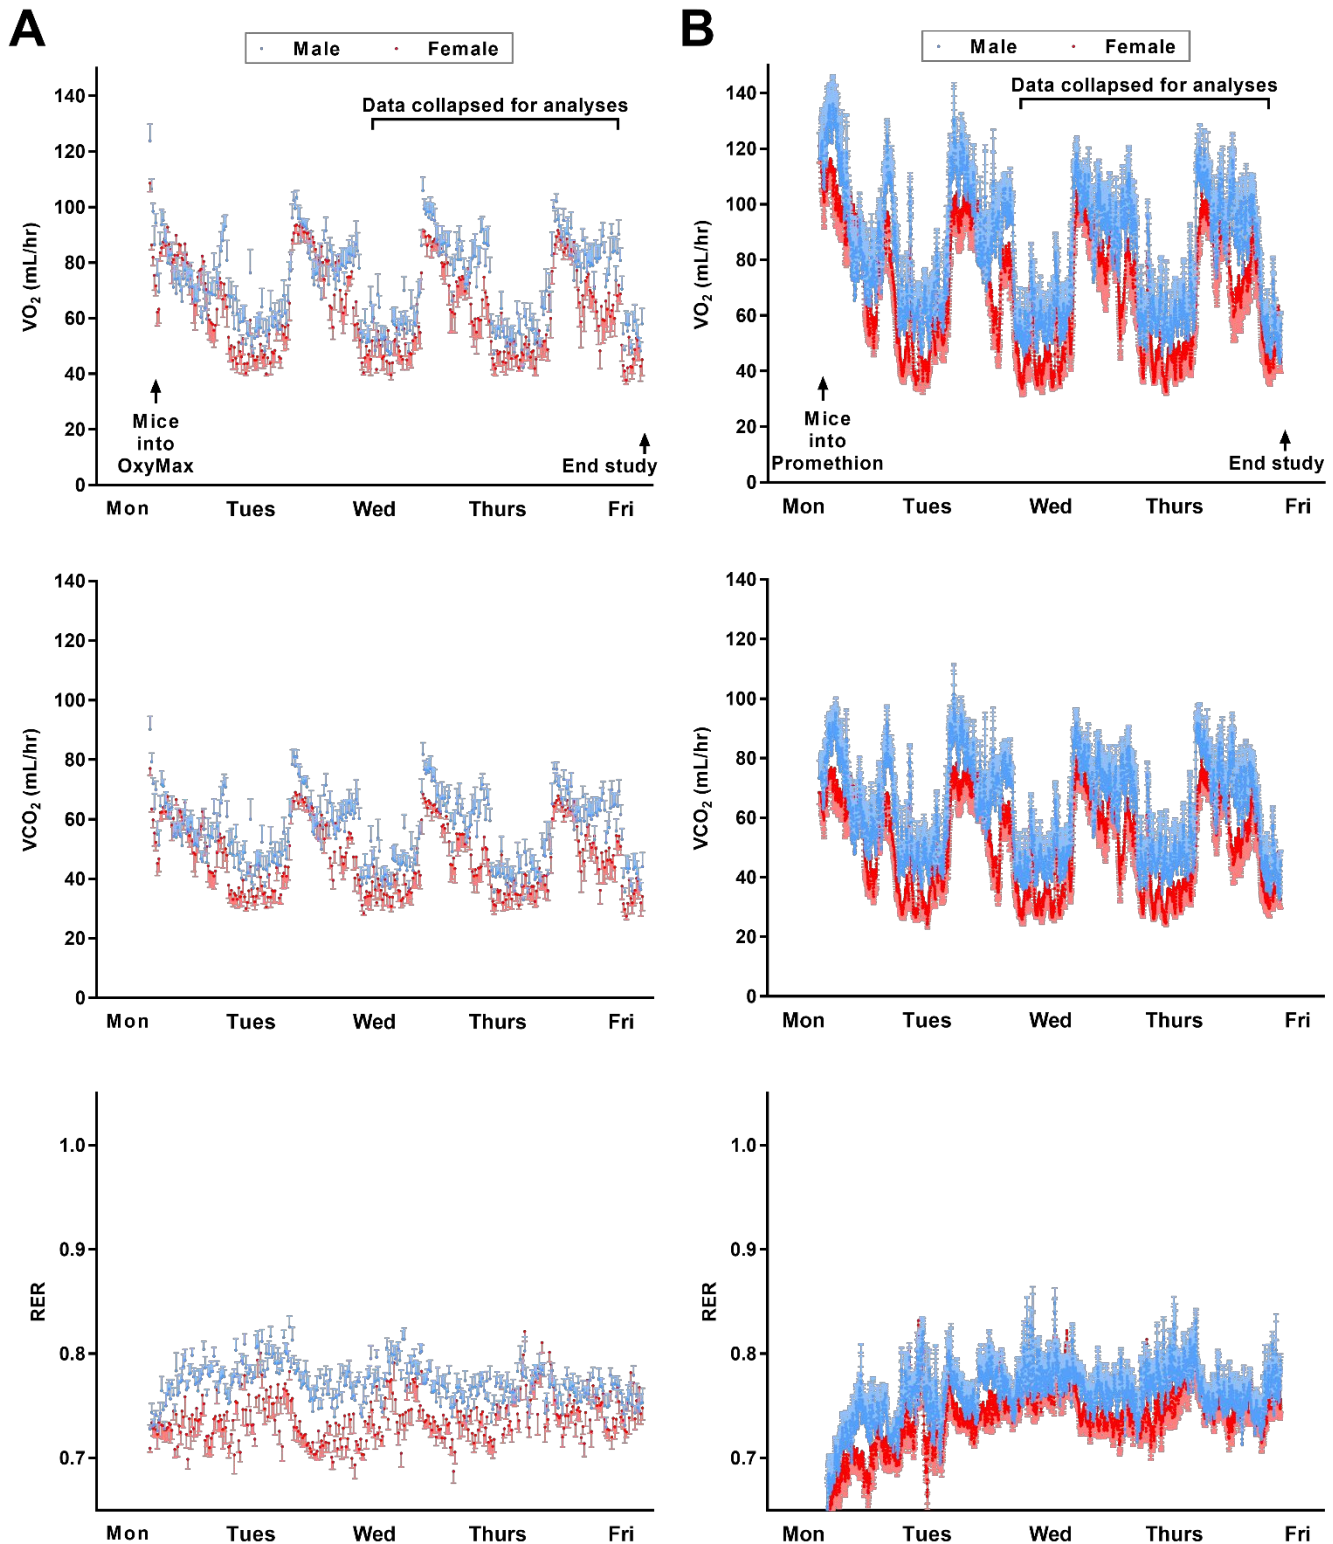

**Supplemental Figure S2.** Gas analyzer outputs versus time for entire acclimation plus analysis periods, for C57BL/6J mice fed 60% HFD for 5 weeks, at 16 weeks of age. (A) VO<sub>2</sub>, VCO<sub>2</sub> and RER values obtained from OxyMax system. (B) VO<sub>2</sub>, VCO<sub>2</sub>, and RER values obtained from Promethion system. For all studies, n=8 males in OxyMax and 8 in Promethion + 7 females in OxyMax and 8 in Promethion. Data are presented as mean ± SEM (only showing error bars in a single direction, for clarity). Males are illustrated in blue, and females in red.

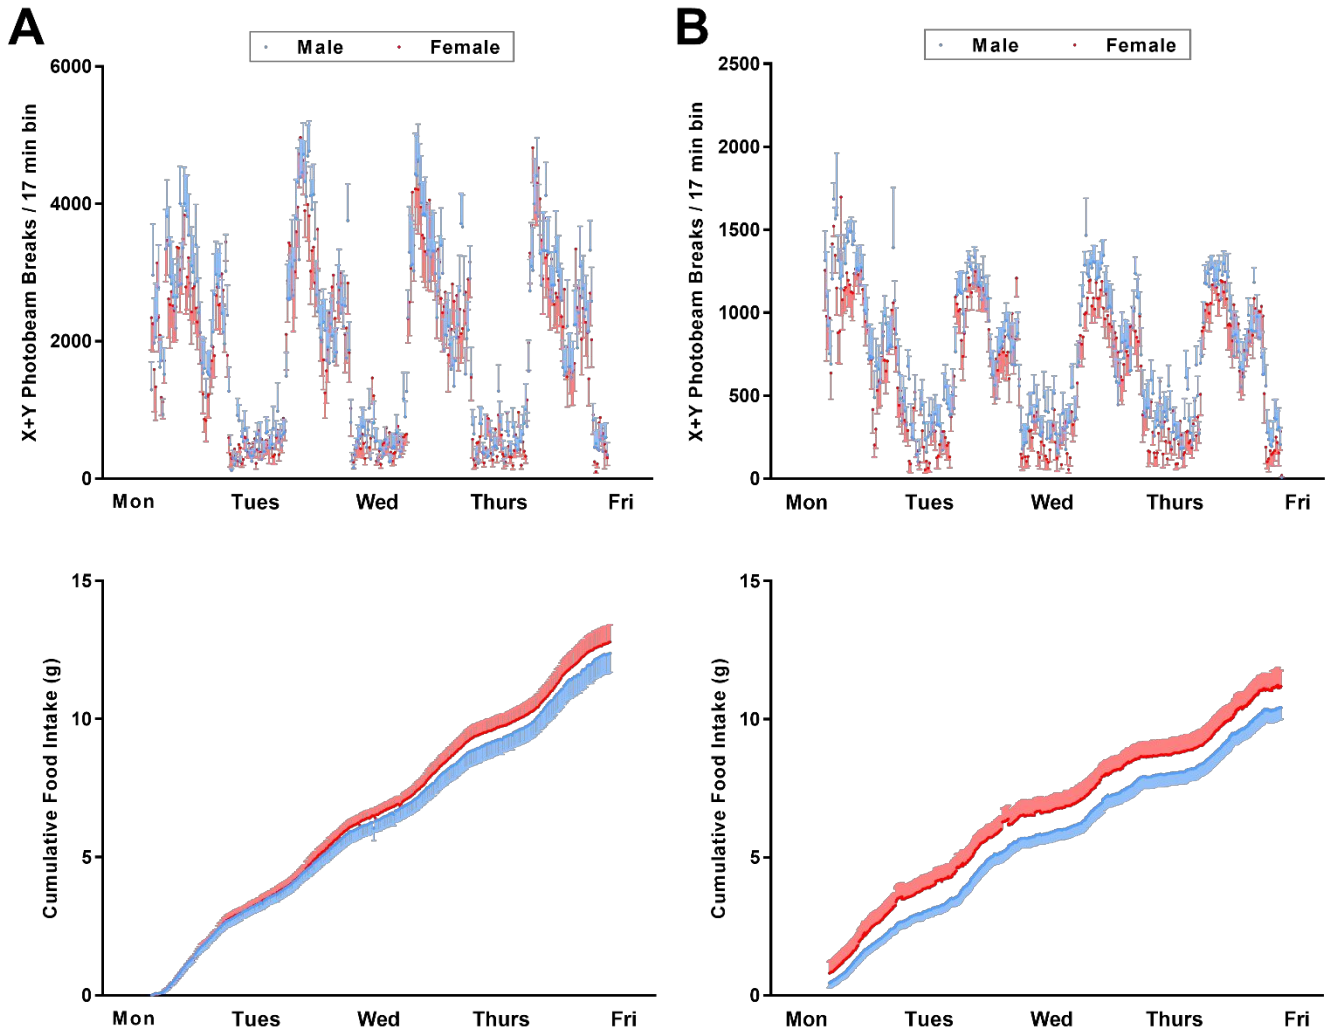

**Supplemental Figure S3. Physical activity and food intake versus time for entire acclimation plus analysis periods, for C57BL/6J mice maintained on 2920x chow, at 10-11 weeks of age.** (A) Photoelectric beam break counts per 17 minute bin, and cumulative food intake data obtained from OxyMax system. (B) Photoelectric beam break counts (per 17 minute bin, to match sampling rate of OxyMax), and cumulative food intake data obtained from Promethion system. For food intake graphs, only positive error bars for females and negative error bars for males are plotted. For all studies,  $n=16$  males + 15 females. Data are presented as mean  $\pm$  SEM (only showing error bars in a single direction, for clarity). Males are illustrated in blue, and females in red.



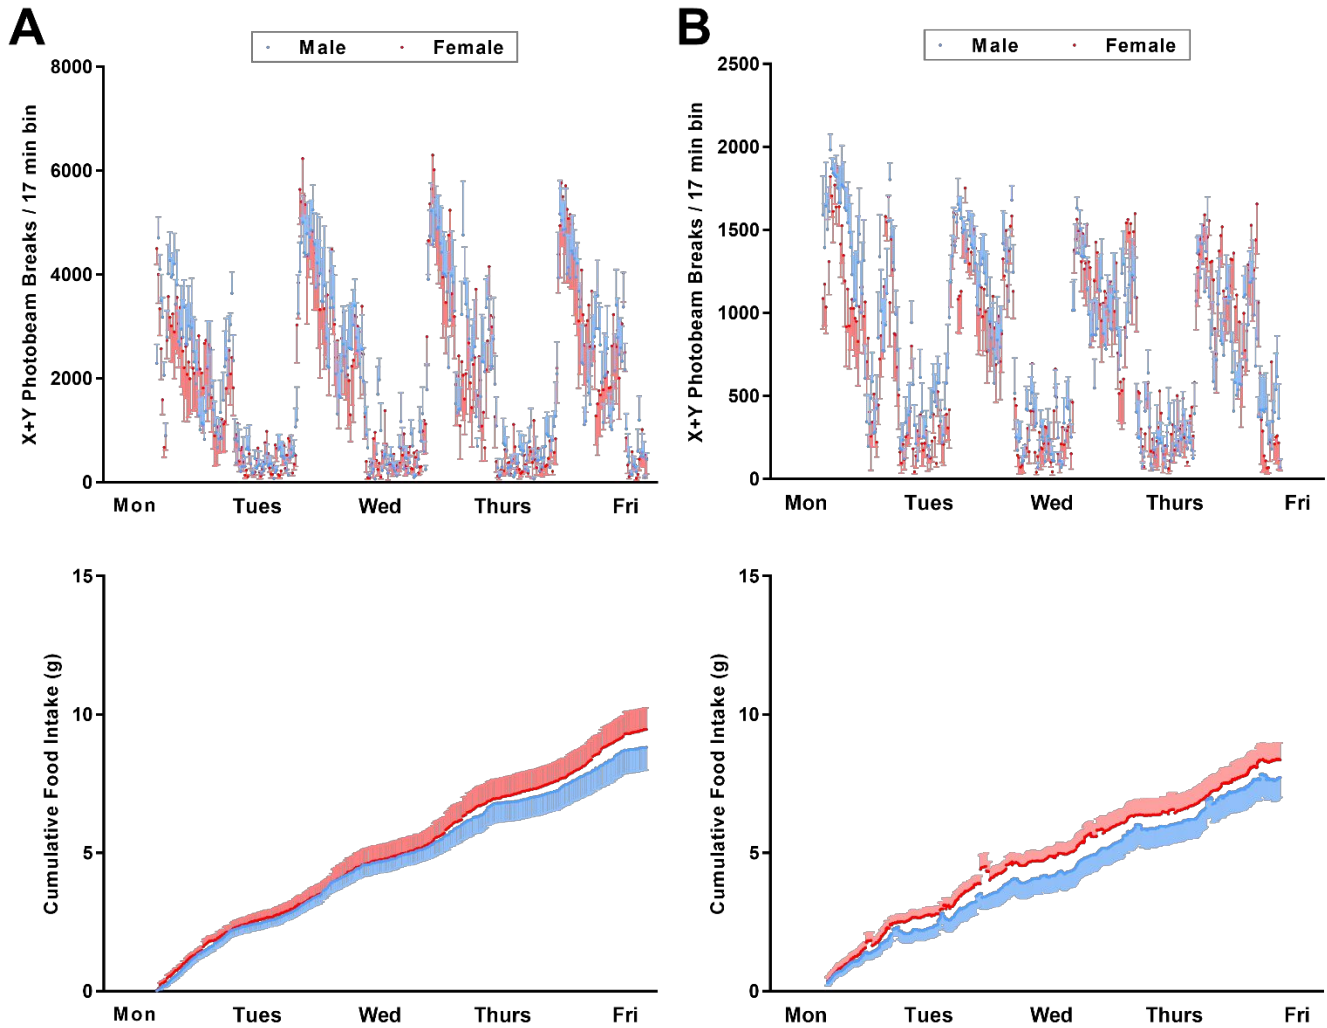

**Supplemental Figure S4. Physical activity and food intake versus time for entire acclimation plus analysis periods, for C57BL/6J mice fed 60% HFD for 5 weeks, at 16 weeks of age.** A) Photoelectric beam break counts per 17 minute bin, and cumulative food intake data obtained from OxyMax system. (B) Photoelectric beam break counts (per 17 minute bin, to match sampling rate of OxyMax), and cumulative food intake data obtained from Promethion system. For food intake graphs, only positive error bars for females and negative error bars for males are plotted. For all studies, n=8 males in OxyMax and 8 in Promethion + 7 females in OxyMax and 8 in Promethion. Data are presented as mean  $\pm$  SEM (only showing error bars in a single direction, for clarity). Males are illustrated in blue, and females in red.

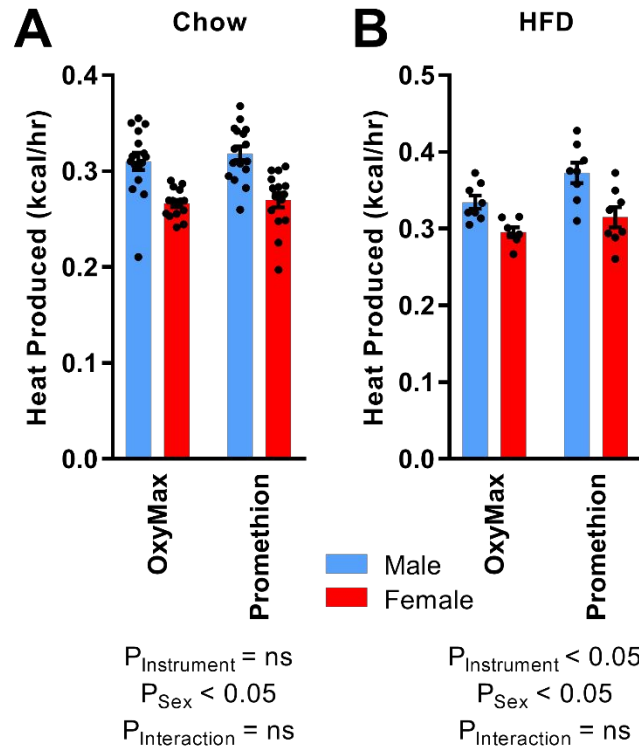

**Supplemental Figure S5. Estimation of heat production rates using the Lusk equation.** (A) Heat production as estimated using the Lusk equation, for mice maintained on 2920x chow, at 10-11 weeks of age. n=16 males + 15 females. (B) Heat production as estimated using the Lusk equation, for mice fed 60% HFD for 5 weeks, at 16 weeks of age. n=8 males in OxyMax and 8 in Promethion + 7 females in OxyMax and 8 in Promethion. Summary data are presented as mean  $\pm$  SEM.

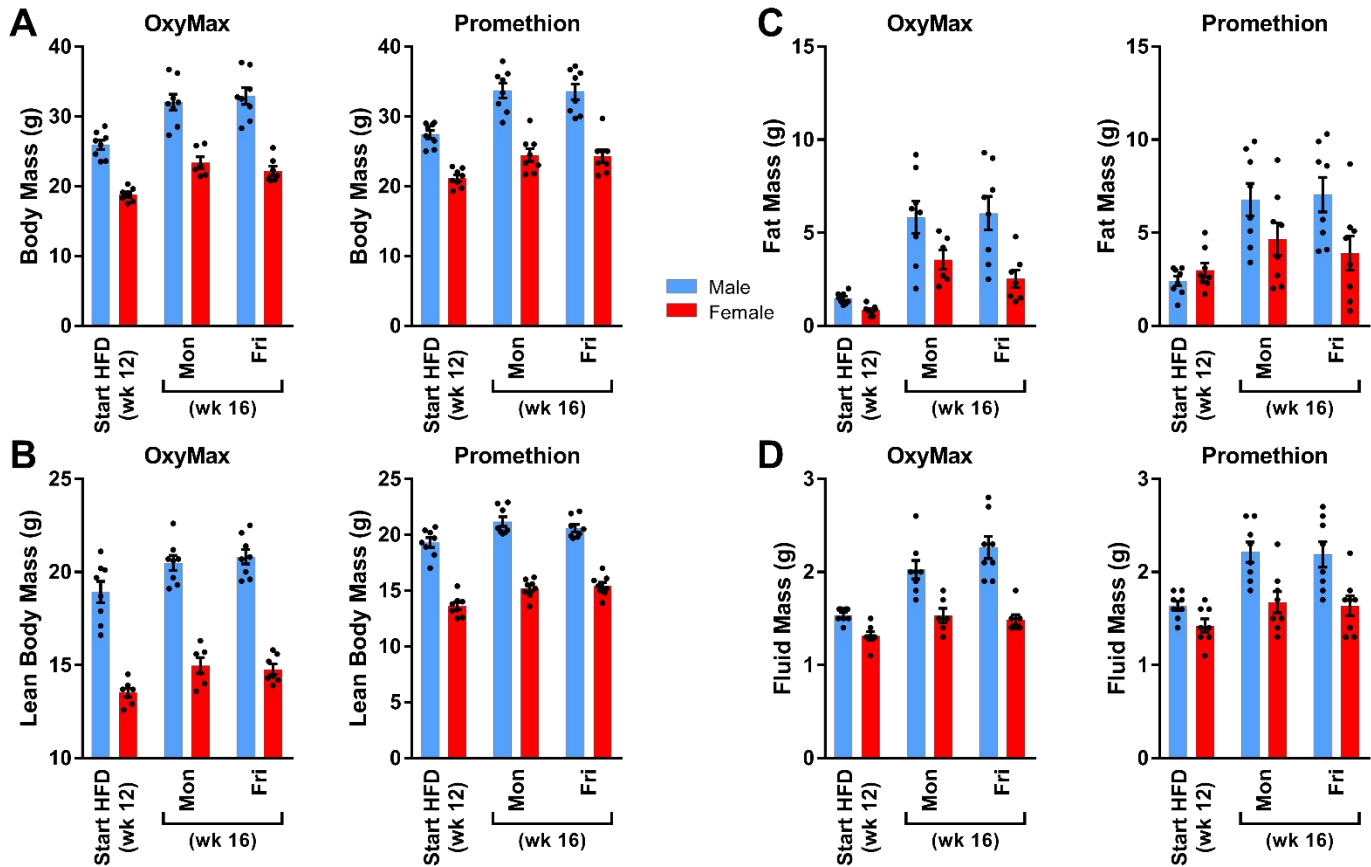

**Supplemental Figure S6. Body composition analyses by time domain nuclear magnetic resonance before and after 4 weeks of 60% HFD.** (A) Total body mass. (B) Lean body mass. (C) Fat mass. (D) Fluid mass. For all endpoints,  $n=8$  males in OxyMax vs 8 in Promethion + 7 females in OxyMax and 8 in Promethion. Comparisons performed by three-way ANOVA with  $p<0.05$  considered significant. Sex  $p<0.05$  and Time  $p<0.05$  for all endpoints, and Instrument  $p<0.05$  for total and fat masses but  $p=ns$  for lean and fluid masses. No significant interactions were observed between [Instrument] and [Sex and/or Time]. Summary data are presented as mean  $\pm$  SEM.
